# Supplementary material for: What makes a rhythm complex? The influence of musical training and accent type on beat perception
Source: PubMed Central journal article supplement (PMC5761885; doi:10.1371/journal.pone.0190322), 2018-01-10

# Annotate

[break](#)

Listen carefully to this rhythm. How hard do you think it would be to tap along with the beat in this rhythm?

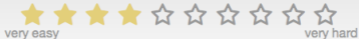

Supplement: pone.0190322.s021.pdf [file pone.0190322.s021.pdf]
